# Supplementary material for: Protein Intake, Fatigue and Quality of Life in Stable Outpatient Kidney Transplant Recipients
Source: PubMed Central journal article supplement (PMC7469059; doi:10.3390/nu12082451), 2020-08-14
Supplement: nutrients-12-02451-s001.pdf [file nutrients-12-02451-s001.pdf]

**Table S1. Final cumulative model of multinomial regression analyses of protein intake (per 10g/d increment) with fatigue in KTR**

| CIS                                              | No Fatigue  |         | Moderate Fatigue   |         | Severe Fatigue     |         |
|--------------------------------------------------|-------------|---------|--------------------|---------|--------------------|---------|
|                                                  | <20         |         | 20-34              |         | ≥ 35               |         |
|                                                  | OR (95% CI) | P-value | OR (95% CI)        | P-value | OR (95% CI)        | P-value |
| Protein intake                                   | Reference   | (-)     | 0.89 (0.80 – 1.00) | 0.06    | 0.80 (0.71 – 0.91) | < 0.001 |
| Age                                              | Reference   | (-)     | 1.00 (0.98 – 1.01) | 0.75    | 1.00 (0.98 – 1.02) | 0.94    |
| Sex                                              | Reference   | (-)     | 1.19 (0.71 – 1.98) | 0.51    | 0.84 (0.49 – 1.44) | 0.53    |
| BMI                                              | Reference   | (-)     | 1.05 (1.0 – 1.11)  | 0.05    | 1.10 (1.04 – 1.17) | <0.001  |
| Diabetes                                         | Reference   | (-)     | 1.56 (0.91 – 2.66) | 0.10    | 2.25 (1.31 – 3.88) | 0.003   |
| Pre-emptive Tx                                   | Reference   | (-)     | 0.65 (0.40 – 1.05) | 0.08    | 0.56 (0.34 – 0.94) | 0.03    |
| eGFR                                             | Reference   | (-)     | 1.00 (0.98 – 1.01) | 0.46    | 0.99 (0.98 – 1.01) | 0.29    |
| Primary kidney disease                           |             |         |                    |         |                    |         |
| - Glomerulonephritis                             | Reference   | (-)     | 1.12 (0.57 – 2.22) | 0.74    | 2.46 (1.20 – 5.01) | 0.01    |
| - Interstitial nephritis                         | Reference   | (-)     | 0.81 (0.35 – 1.87) | 0.63    | 0.82 (0.33 – 2.04) | 0.67    |
| - Cystic Kidney Disease                          | Reference   | (-)     | 0.69 (0.35 – 1.36) | 0.28    | 1.15 (0.55 – 2.38) | 0.72    |
| - Other congenital and hereditary kidney disease | Reference   | (-)     | 0.91 (0.30 – 2.83) | 0.87    | 1.63 (0.51 – 5.23) | 0.41    |
| - Renovascular disease                           | Reference   | (-)     | 1.06 (0.51 – 2.21) | 0.88    | 0.71 (0.30 – 1.68) | 0.44    |

|                              |           |     |                    |      |                    |      |
|------------------------------|-----------|-----|--------------------|------|--------------------|------|
| - Diabetes                   | Reference | (-) | 0.67 (0.19 – 2.39) | 0.54 | 1.51 (0.45 – 5.10) | 0.51 |
| - Other multisystem diseases | Reference | (-) | 1.43 (0.45 – 4.51) | 0.55 | 1.35 (0.36 – 5.01) | 0.66 |
| - Other                      | Reference | (-) | 0.61 (0.13 – 2.94) | 0.54 | 1.34 (0.30 – 5.98) | 0.70 |
| Proteinuria                  | Reference | (-) | 0.51 (0.25 – 1.01) | 0.05 | 1.04 (0.54 – 2.02) | 0.90 |
| Time since Tx                | Reference | (-) | 1.02 (0.99 – 1.06) | 0.18 | 1.03 (1.00 – 1.07) | 0.08 |
| Use of cyclosporin           | Reference | (-) | 0.83 (0.44 – 1.59) | 0.58 | 1.31 (0.70 – 2.48) | 0.40 |
| Use of mycophenolic acid     | Reference | (-) | 1.25 (0.71 – 2.22) | 0.44 | 0.87 (0.48 – 1.56) | 0.63 |
| History of combined organ Tx | Reference | (-) | 13.6 (1.37 – 135)  | 0.03 | 12.6 (1.30 – 123)  | 0.03 |
| SBP                          | Reference | (-) | 1.00 (0.98 – 1.01) | 0.73 | 0.99 (0.98 – 1.01) | 0.36 |
| Cholesterol                  | Reference | (-) | 0.91 (0.72 – 1.16) | 0.46 | 1.03 (0.81 – 1.31) | 0.82 |
| Statin use                   | Reference | (-) | 1.15 (0.72 – 1.81) | 0.56 | 0.74 (0.46 – 1.19) | 0.21 |
| Hemoglobin                   | Reference | (-) | 1.06 (0.84 – 1.34) | 0.63 | 0.97 (0.76 – 1.24) | 0.80 |
| Ferritin                     | Reference | (-) | 1.00 (0.99 – 1.00) | 0.70 | 1.00 (1.00 – 1.00) | 0.57 |
| Vitamin B12                  | Reference | (-) | 1.00 (0.99 – 1.00) | 0.57 | 1.00 (1.00 – 1.00) | 0.13 |
| Albumin                      | Reference | (-) | 0.93 (0.86 – 1.02) | 0.11 | 0.93 (0.85 – 1.01) | 0.10 |
| CRP                          | Reference | (-) | 1.00 (0.98 – 1.03) | 0.75 | 1.00 (0.97 – 1.02) | 0.67 |
| Smoking                      | Reference | (-) | 0.92 (0.45 – 1.86) | 0.81 | 1.59 (0.80 – 3.14) | 0.18 |

|                     |           |     |                    |       |                    |      |
|---------------------|-----------|-----|--------------------|-------|--------------------|------|
| Alcohol use         | Reference | (-) | 1.03 (0.63 – 1.68) | 0.92  | 0.70 (0.42 – 1.16) | 0.17 |
| Level of education* |           |     |                    |       |                    |      |
| - Intermediate      | Reference | (-) | 0.47 (0.27 – 0.79) | 0.004 | 0.87 (0.50 – 1.50) | 0.61 |
| - High              | Reference | (-) | 0.71 (0.41 – 1.23) | 0.22  | 0.80 (0.44 – 1.46) | 0.46 |

---

\*low education is reference group; Abbreviations: 95% CI: 95% confidence interval; BMI: Body Mass Index; eGFR: estimated glomerular filtration rate; CIS: Checklist Individual Strength; g/kg/d: grams per kilogram per day; CRP: C-reactive protein; OR: Odds Ratio; SBP: systolic blood pressure; Tx: transplantation.

**Table S2. Association of protein intake\* (per 0.1 g/kg/d increment) with fatigue in KTR**

| CIS     | No Fatigue          |         | Moderate Fatigue    |         | Severe Fatigue      |         |
|---------|---------------------|---------|---------------------|---------|---------------------|---------|
|         | <20                 |         | 20-34               |         | ≥ 35                |         |
|         | Odds Ratio (95% CI) | P-value | Odds Ratio (95% CI) | P-value | Odds Ratio (95% CI) | P-value |
| Crude   | Reference           | (-)     | 0.91 (0.85 – 0.98)  | 0.01    | 0.85 (0.79 – 0.92)  | <0.001  |
| Model 1 | Reference           | (-)     | 0.91 (0.85 – 0.98)  | 0.01    | 0.85 (0.79 – 0.92)  | <0.001  |
| Model 2 | Reference           | (-)     | 0.91 (0.84 – 0.98)  | 0.008   | 0.84 (0.78 – 0.91)  | <0.001  |
| Model 3 | Reference           | (-)     | 0.91 (0.85 – 0.99)  | 0.02    | 0.85 (0.79 – 0.93)  | 0.001   |
| Model 4 | Reference           | (-)     | 0.91 (0.85 – 0.99)  | 0.02    | 0.86 (0.79 – 0.93)  | <0.001  |
| Model 5 | Reference           | (-)     | 0.93 (0.86 – 1.02)  | 0.11    | 0.85 (0.77 – 0.93)  | 0.001   |
| Model 6 | Reference           | (-)     | 0.92 (0.85 – 1.01)  | 0.09    | 0.85 (0.77 – 0.94)  | 0.001   |

\*Protein intake in g/kg/d with adjustment for underweight and obesity: a BMI <20 is adjusted to a BMI of 20 and a BMI ≥ 30 is adjusted to a BMI of 27.5.

Abbreviations: 95% CI: 95% confidence interval; CIS: Checklist Individual Strength; g/kg/d: grams per kilogram per day

Model 1: adjusted for age, sex, BMI

Model 2: adjusted for model 1 variables plus eGFR, proteinuria and primary kidney disease.

Model 3: adjusted for model 2 variables plus time after transplantation, pre-emptive transplantation, living kidney donor, mycophenolic acid use, cyclosporin use and history of combined organ transplantation.

Model 4: adjusted for model 3 variables plus diabetes, systolic blood pressure and cholesterol and statin use.

Model 5: adjusted for model 4 variables plus hemoglobin, ferritin, vitamin B12, albumin, C-reactive protein.

Model 6: adjusted for model 5 variables plus smoking status, alcohol use and level of education.

**Table S3. Association of protein intake\* (per 0.1 g/kg/d increment) with Quality of Life.**

|         | PCS                |         | MCS                 |         |
|---------|--------------------|---------|---------------------|---------|
|         | $\beta$ (95% CI)   | P-value | $\beta$ (95% CI)    | P-value |
| Crude   | 0.62 (0.32 - 0.91) | <0.001  | 0.19 (-0.07 - 0.44) | 0.16    |
| Model 1 | 0.62 (0.34 - 0.90) | <0.001  | 0.18 (-0.07 - 0.43) | 0.16    |
| Model 2 | 0.63 (0.34 - 0.91) | <0.001  | 0.24 (-0.01 - 0.50) | 0.06    |
| Model 3 | 0.54 (0.26 - 0.82) | <0.001  | 0.18 (-0.07 - 0.44) | 0.16    |
| Model 4 | 0.48 (0.19 - 0.76) | 0.001   | 0.17 (-0.09 - 0.43) | 0.21    |
| Model 5 | 0.44 (0.14 - 0.75) | 0.004   | 0.22 (-0.07 - 0.50) | 0.13    |
| Model 6 | 0.44 (0.14 - 0.75) | 0.005   | 0.22 (-0.07 - 0.50) | 0.13    |

\*Protein intake in g/kg/d with adjustment for underweight and obesity: a BMI <20 is adjusted to a BMI of 20 and a BMI  $\geq$  30 is adjusted to a BMI of 27.5.

Abbreviations: 95% CI: 95% confidence interval; g/ d: grams per day; g/kg/day: grams per kilogram per day; MCS: Mental component summary score; PCS: Physical component summary score.

Model 1: adjusted for age, sex, BMI.

Model 2: adjusted for model 1 variables plus eGFR, proteinuria and primary kidney disease.

Model 3: adjusted for model 2 variables plus time after transplantation, pre-emptive transplantation, living kidney donor, mycophenolic acid use, cyclosporin use and a history of combined organ transplantation.

Model 4: adjusted for model 3 variables plus diabetes, systolic blood pressure and cholesterol and statin use.

Model 5: adjusted for model 4 variables plus hemoglobin, ferritin, vitamin B12, albumin, C-reactive protein.

Model 6: adjusted for model 5 variables plus smoking status, alcohol use and level of education.
